# Supplementary material
Source: Springer Nature journal article supplement (https://www.springermedizin.de/resource/supplementary/12913_2005_180_MOESM1_ESM.pdf/9534566)
Supplement: MOESM1 [file 9534566]

1. Let's assume you were presented with the following two scenarios and were asked to choose only one of them. Would you prefer to:

Remain in your current state of health for the rest of your expected life years?

or

Give up some of these life years and live fewer years but without the burden of your kidney disease? *(Please indicate how many life years you would be willing to give up in this case.)*

2. As you are aware, kidney transplantation is the primary therapy for your condition, however it is sometimes associated, theoretically at least, with the probability of death during or shortly after the operation. Please keep in mind that this probability is actually very low and that this is only a hypothetical scenario. Would you prefer to:

Remain in your current state of health for the rest of your expected life years?

or

Undergo a kidney transplant, despite the probability of death during or shortly after the operation? *(Please indicate the maximum failure rate you would accept in this case. For example, stating 10% means that you would agree to be transplanted only if someone could "magically" guarantee 90% success.)*

3. As you probably know, in our country as in most others as well, the cost of a kidney transplant is covered entirely by the state and from insurance. This means that if you were to be transplanted, you would not be required to make any payment. However, we are very interested in understanding how much you value a kidney transplant. Let us assume you have the opportunity to undergo a transplant immediately but, hypothetically of course, you would be asked to pay for this with money out of your own pocket. Would you be willing to pay €15,000 for the transplant? Before answering, keep in mind that paying this amount may result in your other individual or family needs not being fulfilled. We remind you that this question is entirely hypothetical and that you will never be asked to pay any amount of money for a transplant.

YES, I would be willing to pay €15,000

NO, I would not be willing to pay €15,000

Would you be willing to pay even more than €15,000 for the transplant? If so, how much exactly?

Would you perhaps be willing to pay less than €15,000 for the transplant? If so, how much exactly?
